# Supplementary material for: Gait Assessment in Chronic Inflammatory Demyelinating Polyradiculoneuropathy
Source: Hindawi journal article supplement (doi:10.1155/2024/7037704), 2024-01-01
Supplement: f1 [file 7037704.f1.docx]

*Supplementary Table 1. Correlation between changes in gait test and clinical outcomes: Results expressed in correlation coefficients (p-values)*

|  | **INCAT** | **IRODS** | **Grip strength** | **MRC-SS** |
| --- | --- | --- | --- | --- |
| **TUG** | 0.269 (0.136) | -0.363 (0.041) | -0.412 (0.019) | -0,487 (0.005) |
| **10MWT** | 0.081 (0.659) | -0.283 (0.116) | 0.241 (0.184) | -0.297 (0.099) |
| **30SCS** | -0.255 (0.158) | 0.544 (0.001) | 0.515 (0.003) | 0.398 (0.024) |

*I-RODS: Inflammatory Rasch-Built Overall Disability Scale; MRC-SS: manual muscle strength according to the Medical Research Council sum score; TUG: Timed Up and Go; 10MWT: 10-Meter Walk Test; 30SCS: 30-Second Chair Stand.*
