# Supplementary figures and images for: Gait Assessment in Chronic Inflammatory Demyelinating Polyradiculoneuropathy
Source: Hindawi journal article supplement (doi:10.1155/2024/7037704), 2024-01-01

### TUG

(AUC = 0.919; CI 0.804-1)

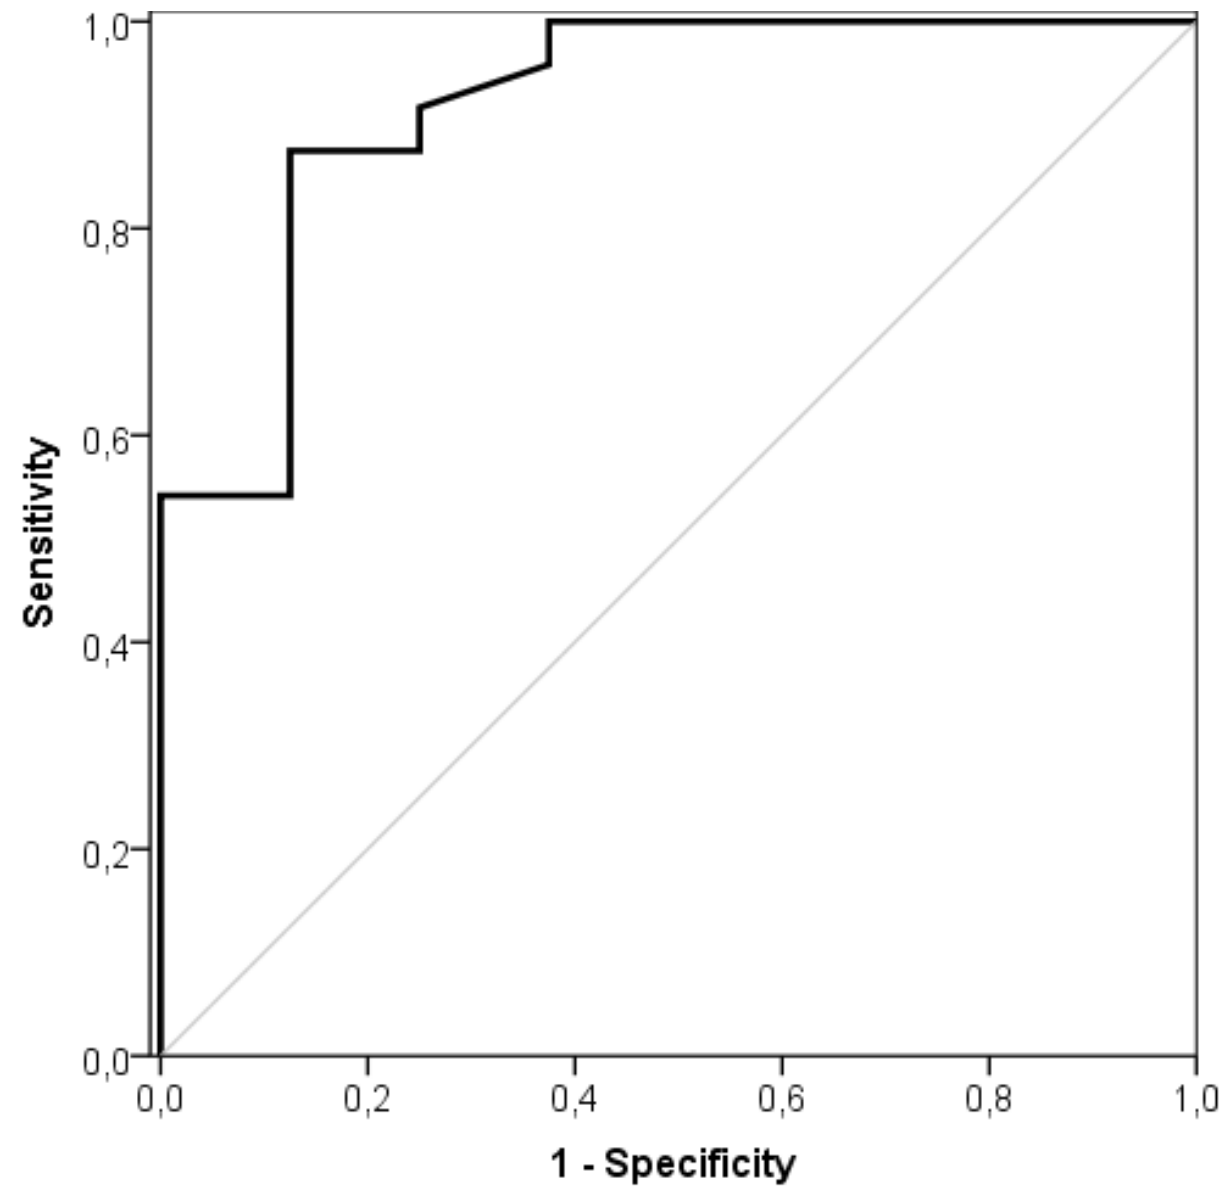

### 10MWT

AUC = 0.711; CI 0.482-0.94)

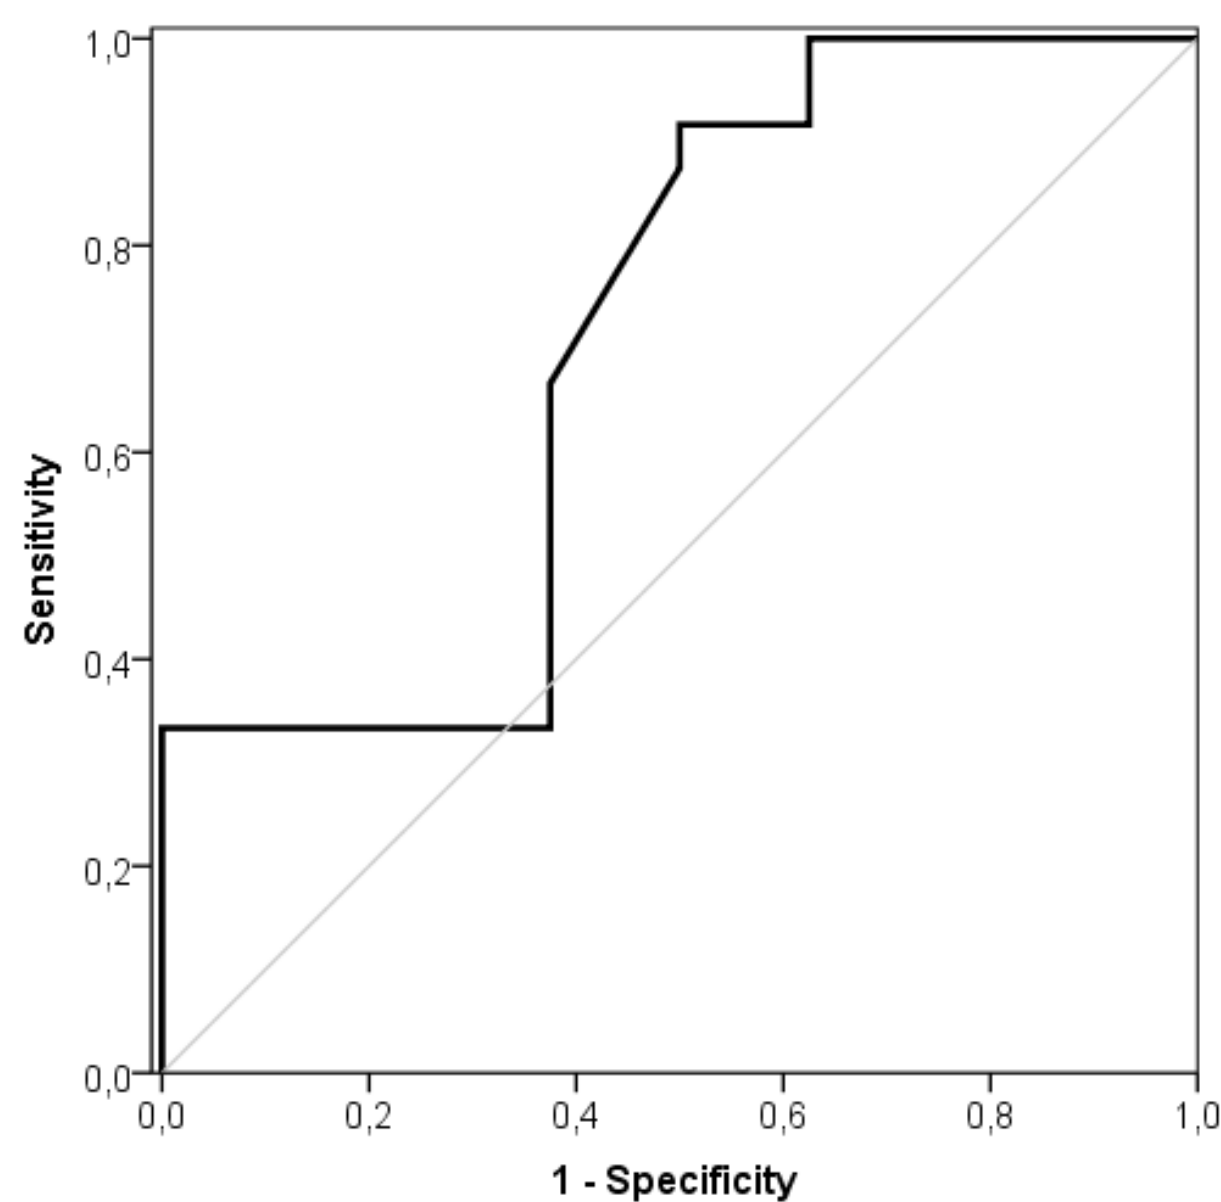

### 30SCS

(AUC = 0.961; CI 0.900-1)

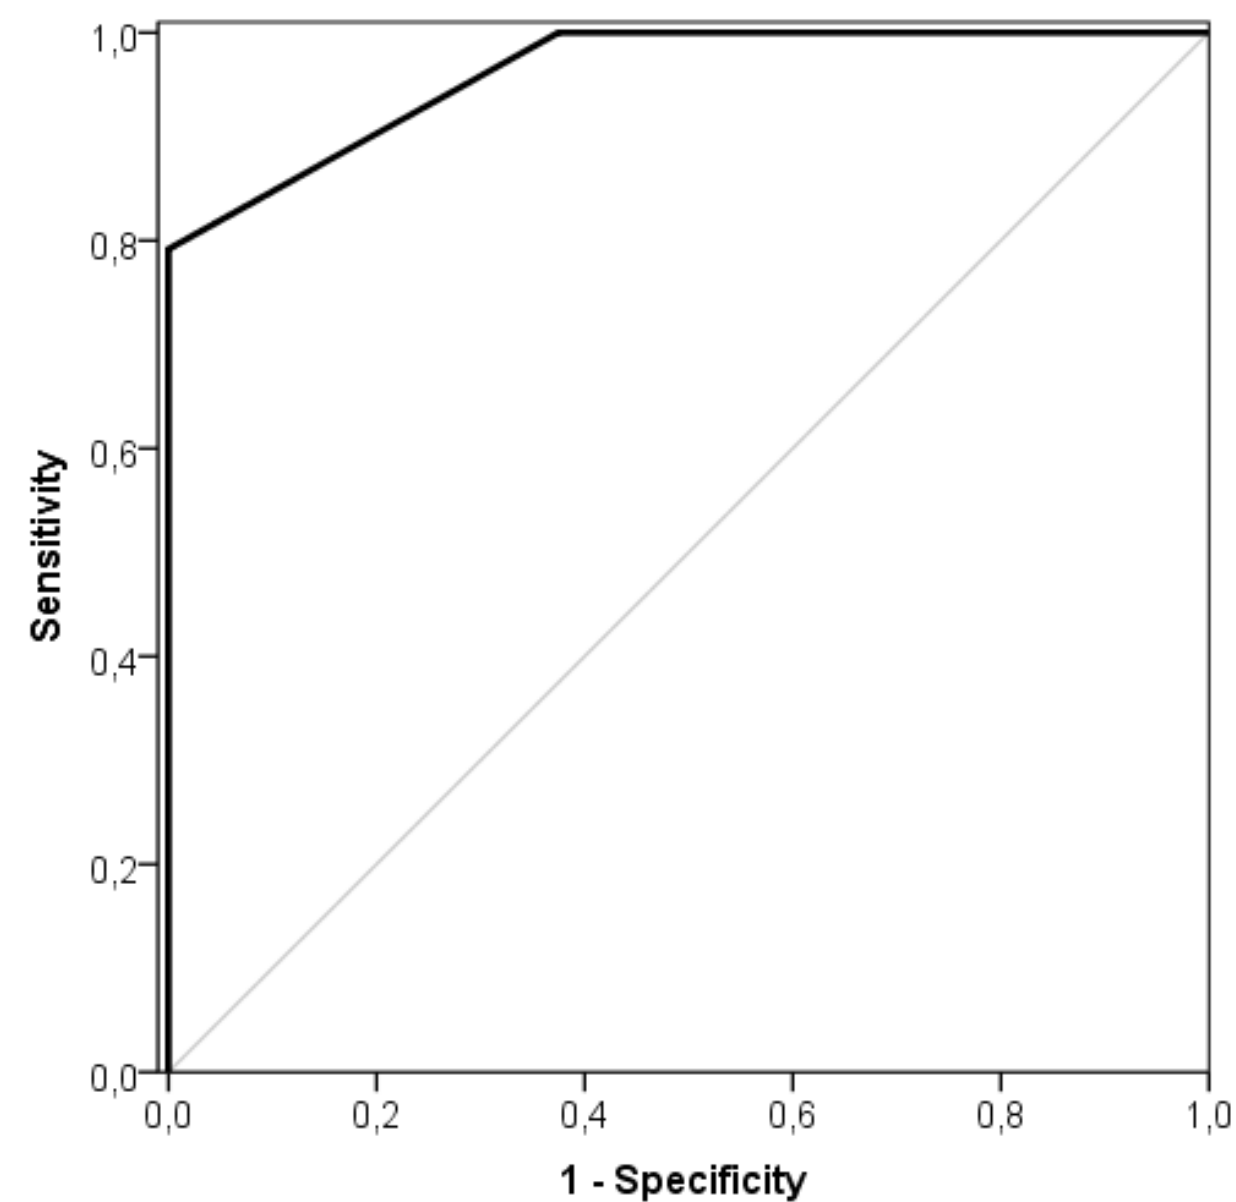

Supplement: f2 [file 7037704.f2.pdf]
